# 1 Geometric constraints dominate the antigenic evolution of 2 influenza H3N2 hemagglutinin

3 Austin G. Meyer<sup>1,2</sup> and Claus O. Wilke<sup>1\*</sup>

4 **1 Department of Integrative Biology, Institute for Cellular and Molecular Biology,**  
5 **and Center for Computational Biology and Bioinformatics. The University of**  
6 **Texas at Austin, Austin, TX 78712, USA.**

7 **2 School of Medicine, Texas Tech University Health Sciences Center, Lubbock,**  
8 **TX 79430, USA.**

9 \* Corresponding author: [wilke@austin.utexas.edu](mailto:wilke@austin.utexas.edu)

10 Keywords: influenza, hemagglutinin, immune epitope, evolution

## 11 Abstract

12 We have carried out a comprehensive analysis of the determinants of human influenza A H3  
13 hemagglutinin evolution, considering three distinct predictors of evolutionary variation at in-  
14 dividual sites: solvent accessibility (as a proxy for protein fold stability and/or conservation),  
15 experimental epitope sites (as a proxy for host immune bias), and proximity to the receptor-  
16 binding region (as a proxy for protein function). We found that these three predictors individ-  
17 ually explain approximately 15% of the variation in site-wise  $dN/dS$ . The solvent accessibility  
18 and proximity predictors were largely independent of each other, while the epitope sites were not.  
19 In combination, solvent accessibility and proximity explained 32% of the variation in  $dN/dS$ .  
20 Incorporating experimental epitope sites into the model added only an additional 2 percentage  
21 points. We also found that the historical H3 epitope sites, which date back to the 1980s and  
22 1990s, showed only weak overlap with the latest experimental epitope data. Finally, sites with  
23  $dN/dS > 1$ , i.e., the sites most likely driving seasonal immune escape, are not correctly predicted  
24 by either historical or experimental epitope sites, but only by proximity to the receptor-binding  
25 region. In summary, proximity to the receptor-binding region, and not host immune bias, seems  
26 to be the primary determinant of H3 evolution.

## 27 Author summary

28 The influenza virus is one of the most rapidly evolving human viruses. Every year, it accumulates  
29 mutations that allow it to evade the host immune response of previously infected individuals.  
30 Which sites in the virus' genome allow this immune escape and the manner of escape is not  
31 entirely understood, but conventional wisdom states that specific "immune epitope sites" in the  
32 protein hemagglutinin are preferentially attacked by host antibodies and that these sites mutate  
33 to directly avoid host recognition; as a result, these sites are commonly targeted by vaccine  
34 development efforts. Here, we combine influenza hemagglutinin sequence data, protein structural  
35 information, experimental immune epitope data, and historical epitopes to demonstrate that  
36 neither the historical epitope groups nor epitopes based on experimental data are crucial for

37 predicting the rate of influenza evolution. Instead, we find that a simple geometrical model  
38 works best: sites that are closest to the location where the virus binds the human receptor are  
39 the primary driver of hemagglutinin evolution. There are two possible explanations for this  
40 result. First, the existing historical and experimental epitope sites may not be the real antigenic  
41 sites in hemagglutinin. Second, alternatively, hemagglutinin antigenicity may not be the primary  
42 driver of influenza evolution.

## 43 Introduction

44 The influenza virus causes one of the most common infections in the human population. The  
45 success of influenza is largely driven by the virus's ability to rapidly adapt to its host and escape  
46 host immunity. The antibody response to the influenza virus is determined by the surface pro-  
47 teins hemagglutinin (HA) and neuraminidase (NA). Among these two proteins, hemagglutinin,  
48 the viral protein responsible for receptor binding and uptake, is a major driver of host immune  
49 escape by the virus. Previous work on hemagglutinin evolution has shown that the protein  
50 evolves episodically [1–3]. During most seasons, hemagglutinin experiences mostly neutral drift  
51 around the center of an antigenic sequence cluster; in those seasons, it can be neutralized by  
52 similar though not identical antibodies, and all of the strains lie near each other in antigenic  
53 space [4–7]. After several seasons, the virus escapes its local sequence cluster to establish a new  
54 center in antigenic space [7–9].

55 There is a long tradition of research aimed at identifying important regions of the hemag-  
56 glutinin protein, and by proxy, the sites that determine sequence-cluster transitions [4, 6, 10–21].  
57 Initial attempts to identify and categorize important sites of H3 hemagglutinin were primarily  
58 sequence-based and focused on substitutions that took place between 1968, the emergence of  
59 the Hong Kong H3N2 strain, and 1977 [10, 11]. Those early studies used the contemporaneously  
60 solved protein crystal structure, a very small set of mouse monoclonal antibodies, and largely  
61 depended on chemical intuition to identify antigenically relevant amino-acid changes in the ma-  
62 ture protein. Many of the sites identified in those studies reappeared nearly two decades later,  
63 in 1999, as putative epitope sites with no additional citations linking them to actual immune  
64 data [4]. Those sites and their groupings are still considered the canonical immune epitope set  
65 today [3, 16, 22]. While the limitations of experimental techniques and of available sequence  
66 data in the early 1980's made it necessary to form hypotheses based on chemical intuition, these  
67 limitations are starting to be overcome through recent advances in experimental immunological  
68 techniques and wide-spread sequencing of viral genomes. Therefore, it is time to revisit the  
69 question of whether or not the host immune system directly pressures influenza to evolve to es-  
70 cape antibody binding, or perhaps, there is some other indirect manner of immune escape. For  
71 example, at least one recent model has suggested that the hemagglutinin protein may evolve to  
72 modulate receptor-binding avidity rather than to modulate antibody-binding [23]. Moreover,  
73 since the original epitope set was identified via sequence analysis, we do not even know whether  
74 *bona-fide* immune-epitope sites actually exist, i.e., sites which represent a measurable bias in  
75 the host immune response. Most importantly, even if immune-epitope sites do exist and can be  
76 experimentally identified, it is possible that they do not experience more positive selection than  
77 other important sites in the protein.

78 Some recent studies have begun to address these questions indirectly, via evolutionary anal-  
79 ysis. For example, over the last two decades, virtually every major study on positive selection in  
80 hemagglutinin has found some but never all of the historical epitope sites to be under positive  
81 selection [3, 16, 18, 19, 23]. Furthermore, each of these studies has found a set of sites that are  
82 under positive selection but do not belong to any historical epitope. Finally, because every study  
83 identifies slightly different sites, there seems to be no broad agreement on which sites are under  
84 positive selection [12, 16, 18, 19]. The sites found by disparate techniques are similar but they  
85 are never identical.

86 To dissect the determinants of hemagglutinin evolution, we here linked several predictors,  
87 including relative solvent accessibility, the inverse distance from the receptor-binding region,  
88 and experimental immune epitope data, to site-wise evolutionary rates calculated from all of  
89 the human H3N2 sequence data for the last 22 seasons (1991–2014). We found that, indi-  
90 vidually, all these predictors explained approximately 15% of evolutionary rate variation. In  
91 addition, we analyzed all of the available H3 experimental epitope data, and we found that  
92 current experimental data does not at all reflect the historical epitope sites or their groups.  
93 After controlling for biophysical constraints with relative solvent accessibility and function with  
94 distance to the receptor-binding region, the remaining predictive power of either experimental or  
95 historical categories was relatively low. Finally, by explicitly accounting for RSA, proximity, and  
96 host immune data, we found that we could predict nearly 35% of the evolutionary rate variation  
97 in hemagglutinin, nearly twice as much variation as could be explained by earlier models.

## 98 Results

### 99 Relationship between evolutionary rate and inverse distance to the receptor- 100 binding site

101 Our overarching goal in this study was to identify specific biophysical or biochemical properties of  
102 the mature protein that determine whether a given site will evolve rapidly or not. As a measure  
103 of evolutionary variation and selective pressure, we used the metric  $dN/dS$ .  $dN/dS$  can measure  
104 both the amount of purifying selection acting on a site (when  $dN/dS \ll 1$  at that site) and the  
105 amount of positive diversifying selection acting on a site (when  $dN/dS \gtrsim 1$ ). For simplicity, we  
106 will refer to  $dN/dS$  as an *evolutionary rate*, even though technically it is a *relative* evolutionary  
107 rate or evolutionary-rate ratio. We built an alignment of 3854 full-length H3 sequences spanning  
108 22 seasons, from 1991/92 to 2013/14. We subsequently calculated  $dN/dS$  at each site, using a  
109 one-rate fixed-effects likelihood (FEL) model as implemented in the software HyPhy [24].

110 Several recent works have shown that site-specific evolutionary variation is partially pre-  
111 dicted by a site’s solvent exposure and/or number of residue-residue contacts in the 3D struc-  
112 ture [19, 20, 25–30] (see Ref. [31] for a recent review). This relationship between protein struc-  
113 ture and evolutionary conservation likely reflects the requirement for proper and stable protein  
114 folding: Mutations at buried sites or sites with many contacts are more likely to disrupt the  
115 protein’s conformation [30] or thermodynamic stability [32]. In addition, there may be func-  
116 tional constraints on site evolution. For example, regions in proteins involved in protein–protein  
117 interactions or enzymatic reactions are frequently more conserved than other regions [27, 33, 34].  
118 However, these structural and functional constraints generally predict the amount of purifying

119 selection expected at sites, and therefore they cannot identify sites under positive diversify-  
120 ing selection. Moreover, the short divergence time of viruses causes the systematic biophysical  
121 pressures that predict much of eukaryotic protein evolution to be much less dominant in viral  
122 evolution [28]. Thus, we set out to find a constraint on hemagglutinin evolution that was related  
123 to the protein's role in viral binding and fusion.

124 A few earlier studies had shown that sites near the sialic acid-binding region of hemagglu-  
125 tinin tend to evolve more rapidly than the average for the protein [4, 20, 21]. Furthermore,  
126 when mapping evolutionary rates onto the hemagglutinin structure, we noticed that the den-  
127 sity of rapidly evolving sites seemed to increase somewhat towards the receptor-binding region  
128 (Fig. 1A). Therefore, as the primary function of hemagglutinin is to bind to sialic acid and in-  
129 duce influenza uptake, we reasoned that distance from the receptor-binding region of HA might  
130 serve as a predictor of functionally driven HA evolution. We calculated distances from the sialic  
131 acid-binding region (defined as the distance from site 224 in HA), and correlated these distances  
132 with the evolutionary rates at all sites. We found that distance from the receptor-binding re-  
133 gion was a strong predictor of evolutionary rate variation in hemagglutinin (Pearson correlation  
134  $r = 0.41$ ,  $P < 10^{-15}$ ).

135 Next, we wanted to verify that this correlation was representative of hemagglutinin evolution  
136 and not just an artifact of the specific site chosen as the reference point in the distance calcula-  
137 tions. It would be possible, for example, that distances to several spatially separated reference  
138 sites all resulted in similarly strong correlations. We addressed this question systematically by  
139 making, in turn, each individual site in HA the reference site, calculating distances from that site  
140 to all other sites, and correlating these distances with evolutionary rate. We then mapped these  
141 correlations onto the structure of hemagglutinin, coloring each site according to the strength  
142 of the correlation we obtained when we used that site as reference in the distance calculation  
143 (Fig. 1B). We obtained a clean, gradient-like pattern: The correlations were highest when we  
144 calculated distances relative to sites near the receptor-binding site (with the maximum correla-  
145 tion obtained for distances relative to site 224), and they continuously declined and then turned  
146 negative the further we moved the reference site away from the apical region of hemagglutinin  
147 (Fig. 1B). This result was in stark contrast to the pattern we had previously observed when  
148 mapping evolutionary rate directly (Fig. 1A). In that earlier case, while there was a perceptible  
149 preference of faster evolving sites to fall near the receptor-binding site, the overall distribution of  
150 evolutionary rates along the structure looked mostly random to the naked eye. We thus found a  
151 geometrical, distance-based constraint on hemagglutinin evolution: Sites evolve faster the closer  
152 they lie toward the receptor-binding region.

153 We also evaluated how proximity to the receptor-binding region performed as a predictor of  
154  $dN/dS$  in comparison to the previously proposed structural predictors relative solvent accessi-  
155 bility (RSA) and weighted contact number (WCN). We found that among these three quantities,  
156 proximity to the sialic acid-binding region was the strongest predictor, explaining 16% of the  
157 variation in  $dN/dS$  (Pearson  $r = 0.41$ ,  $P < 10^{-15}$ , see also Figs. 2 and S1). RSA and WCN ex-  
158 plained 14% and 6% of the variation in  $dN/dS$ , respectively ( $r = 0.37$ ,  $P < 10^{-15}$  and  $r = 0.25$ ,  
159  $P = 7 \times 10^{-9}$ ). Proximity to the sialic acid-binding region and RSA were virtually uncorrelated  
160 ( $r = 0.08$ ,  $P = 0.09$ ) while RSA and WCN correlated strongly ( $r = -0.64$ ,  $P < 10^{-15}$ ). These  
161 results suggested that proximity to the sialic acid-binding region and RSA should be used jointly  
162 in a predictive model.

163 Because hemagglutinin has, in addition to its function as a receptor-binding protein, a host  
164 of other intermediate functional states during the viral fusion process, we also tested the ability  
165 of structural metrics from the post-fusion state to predict hemagglutinin evolutionary rate [35].  
166 We found no significant metric, either RSA or proximity, derived from the post-fusion state.  
167 (Complete data and analysis scripts are available in the accompanying github repository, see  
168 Methods for details.)

## 169 **Incorporating experimental immunological data**

170 Another potential functional constraint on hemagglutinin evolution is a bias in the human  
171 immune system. This bias, generally referred to as antigenicity, describes the extent to which  
172 the human immune system does a better job attacking one region of a protein compared to  
173 another. Conventional wisdom states that functionally important sites in the protein that are  
174 targeted by antibodies will evolve more rapidly to facilitate immune escape. And indeed, our  
175 results from the previous subsection have shown that proximity to the receptor-binding region  
176 is a good predictor of evolutionary variation. However, if substitutions to avoid direct antibody  
177 binding are the primary cause of positive selection, then we would expect antigenic sites on  
178 hemagglutinin to serve as a substantially better predictors of adaptation than proximity to the  
179 receptor-binding site alone.

180 For influenza hemagglutinin H3, there exists a list of canonical, historical epitope sites that  
181 are commonly considered to represent this bias [4]. However, these sites were not primarily  
182 defined based on actual immunological data, and they have not been re-validated since the late  
183 1990s even though more experimental data is now available. (See Discussion for details on the  
184 history of the historical epitope sites.) Before we could generate a combined evolutionary model,  
185 we therefore considered it essential to validate the antigenic groups with available immunological  
186 data. As it turns out, the majority of antigenic data available did not agree with the historical  
187 epitope sites (Supporting Text S1). Therefore, we used both the historical epitope sites and a  
188 set of experimentally re-defined epitopes for further modeling.

189 A detailed explanation of our re-grouping based on experimental data is available in the  
190 Supplementary Text S1. It is important to note that these groups are not intended to represent  
191 a new canonical set of hemagglutinin epitopes. Indeed, the data from which they were derived  
192 is limited and relatively poorly annotated. However, considering the magnitude of the difference  
193 between the historical epitopes and the available experimental data we considered it imperative  
194 to include experimentally derived epitopes in our analysis.

195 Thus, we considered both the historical epitope groups (Bush 1999) and the experimentally  
196 derived epitopes 1–4, defined in the Supplementary Text. Because a site's epitope status is a  
197 categorical variable, we calculated variance explained as the coefficient of determination ( $R^2$ ) in  
198 a linear model with  $dN/dS$  as the response variable and epitope status as the predictor variable.  
199 We found that experimental epitopes explained 15% of the variation in  $dN/dS$ , comparable to  
200 RSA and proximity. In comparison, the historical epitopes alone explained nearly 18% of the  
201 variation in  $dN/dS$ , outperforming all other individual predictor variables considered here (Fig. 2  
202 and Table 1). However, as discussed in the Supplementary Text S1, the available experimental  
203 data suggest that not all of the historical sites may be actual immune epitope sites. Therefore,  
204 we suspected that some of the predictive power of historical sites was due to these sites simply

205 being solvent-exposed sites near the receptor-binding region. We similarly wondered to what  
206 extent the predictive power of the experimental epitope sites was attributable to the same cause,  
207 since, in fact, both historical and experimental epitope sites showed comparable enrichment in  
208 sites near the sialic acid-binding region and in solvent-exposed sites (Fig. S2). Therefore, we  
209 analyzed how the variance explained increased as we combined epitope sites (experimental or  
210 historical) with either RSA or proximity or both.

211 We found that epitope status, under either definition (experimental/historical), led to in-  
212 creased predictive power of the model when combined with either RSA or proximity (Fig. 2).  
213 However, a model consisting of just the two predictors RSA and proximity, not including any  
214 information about epitope status of any sites, performed even better than any of the other one-  
215 or two-predictor models, explaining 32% of the variation in  $dN/dS$  (Fig. 2). Adding epitope sta-  
216 tus to this best-performing two-predictor model resulted in only minor improvement, from 32%  
217 to 34% variance explained in the case of experimental epitopes and from 32% to 37% variance  
218 explained in the case of historical epitope sites (Fig. 2 and Table 1).

## 219 Predicting sites under selection and comparisons to other work

220 The geometrical constraints RSA and proximity explained more variance in  $dN/dS$  than did  
221 epitope sites, but were they also better at predicting sites of interest? Because  $dN/dS$  can  
222 measure purifying as well as positive diversifying selection, the percent variance in  $dN/dS$  that  
223 a model explains may not necessarily accurately reflect how useful that model is in predicting  
224 specific sites, e.g. sites under positive selection. For example, one could imagine a scenario  
225 in which a model does exceptionally well on sites under purifying selection ( $dN/dS \ll 1$ ) but  
226 fails entirely on sites under positive selection ( $dN/dS > 1$ ). Such a model might explain a  
227 large proportion of variance but be considered less useful than a model that overall predicts  
228 less variation in  $dN/dS$  but accurately pinpoints site under positive selection. Therefore, we  
229 wondered whether epitope sites might do a poor job predicting background purifying selection  
230 but might still be useful in predicting sites with  $dN/dS > 1$ . We found, to the contrary,  
231 that neither the historical nor the experimental epitope sites could reliably predict sites with  
232  $dN/dS > 1$ , alone or in combination with RSA (Fig. 3A–D). Proximity to the receptor-binding  
233 site, on the other hand, correctly predicted four sites with  $dN/dS > 1$ , even in the absence of  
234 any other predictors. Notably, all models we considered here were robust to cross-validation.  
235 The cross-validated residual standard error was virtually unchanged from its non-cross-validated  
236 value in all cases (Table 1). Because proximity clearly identified four points with high  $dN/dS$ ,  
237 we also verified that the proximity– $dN/dS$  correlation was not caused just by these four points.  
238 We removed from our data set the four points that had both predicted and observed  $dN/dS >$   
239 1, and found that a significant proximity– $dN/dS$  correlation remained nonetheless ( $r = 0.17$ ,  
240  $p = 0.00001$ ).

241 Finally, we compared the predictions from the geometrical model of hemagglutinin evolution  
242 to results from a recent study of antigenic cluster transitions; that study found seven sites near  
243 the receptor-binding region which were critical for cluster transitions according to hemagglutinin  
244 inhibition (HI) assays with ferret antisera [21]. The sites identified in Ref. [21] were 145, 155,  
245 156, 158, 159, 189, and 193. For comparison, our geometric model (with predictors RSA and  
246  $1/\text{Distance}$ ) predicted none of these sites to be under positive selection. Sites predicted to

247 have  $dN/dS > 1$  were instead 96, 137, 138, 143, 222, 223, 225, and 226. Moreover, out of the  
248 seven sites from Ref. [21], only one (site 145) had an observed  $dN/dS$  significantly above 1. By  
249 contrast, four of the eight sites predicted under the geometric model to have  $dN/dS > 1$  did  
250 indeed have  $dN/dS$  significantly above 1. Thus, the sites that determine the major antigenic  
251 changes in the virus did not at all overlap with the sites expected and observed to be under the  
252 greatest evolutionary pressure. When investigating the location of these sites in detail, we found  
253 that all of the sites we predicted to have  $dN/dS > 1$  were located just basal to the receptor-  
254 binding site, whereas nearly all of the sites from [21] (with the exception of 145, the site with  
255  $dN/dS > 1$ ) were located on the apical side of the receptor-binding site (Fig. 4).

256 In summary, we have found that two simple geometric measures of a site's location in the 3D  
257 protein structure, solvent exposure and proximity to the receptor-binding region, jointly out-  
258 performed, by a wide margin, any previously considered predictor of evolutionary variation in  
259 hemagglutinin, including immune epitope groups. In fact, the vast majority of the variation in  
260 evolutionary rate that was explained by the historical epitope sites was likely due to these sites  
261 simply being located near the receptor-binding region on the surface of the protein. However,  
262 historical epitope sites, in combination with solvent exposure and proximity, had some resid-  
263 ual explanatory power beyond even a three-predictor model that combined the two geometric  
264 measures with experimental immune-epitope data. We suspect that this residual explanatory  
265 power reflects the sequence-based origin of the historical epitope sites. To our knowledge, the  
266 historical epitope sites were at least partially identified by observed sequence variation, so that,  
267 to some extent, these sites are simply the sites that have been observed to evolve rapidly in  
268 hemagglutinin.

## 269 Discussion

270 We have conducted a thorough analysis of the determinants of site-specific hemagglutinin evo-  
271 lution. Most importantly, we have found that host immune bias (as currently measured by  
272 experimental and historical epitopes) accounts for a very small but significant portion of the  
273 evolutionary pressure on influenza hemagglutinin. In addition, we have found that epitope sta-  
274 tus cannot predict hemagglutinin sites under positive selection. By contrast, a simple geometric  
275 measure, receptor-binding proximity, is both a combined strong predictor of evolutionary rate  
276 and is the only quantity that can predict sites with  $dN/dS > 1$ . In addition, we have showed  
277 that a simple linear model containing three predictors, solvent accessibility, proximity to the  
278 receptor-binding region, and experimental epitopes, explains nearly 35% of the evolutionary  
279 rate variation in hemagglutinin H3. Therefore, our analysis suggests that one of two possible  
280 explanations must be true. First, it is possible that hemagglutinin antigenicity is not a strong  
281 direct driver of influenza adaptive evolution; rather, it is possible that influenza escapes the hu-  
282 man host immune system by indirect means [23]. Second, alternatively, the current experimental  
283 data and historical epitopes may simply be insufficient and/or incorrect. Such a situation would  
284 explain why neither epitope definition can explain much evolutionary rate variation beyond  
285 the geometric constraints, and why neither epitope definition can predict sites under positive  
286 selection.

## 287 **History of epitopes in hemagglutinin H3**

288 Efforts to define immune epitope sites in H3 hemagglutinin go back to the early 1980's [10].  
289 Initially, epitope sites were identified primarily by speculating about the chemical neutrality of  
290 amino acid substitutions between 1968 (the year H3N2 emerged) and 1977, though some limited  
291 experimental data on neutralizing antibodies was also considered [10,11]. In 1981, the initial  
292 four epitope groups were defined by non-neutrality (amino-acid substitutions that the authors  
293 believed changed the chemical nature of the side chain) and relative location, and given the  
294 names A through D [10]. Since that original study in 1981, the names and general locations of  
295 H3 epitopes have remained largely unchanged [4,16]. The sites were slightly revised in 1987 by  
296 the same authors and an additional epitope named E was defined [11]. From that point forward  
297 until 1999 there were essentially no revisions to the codified epitope sites. In addition, while  
298 epitopes have since been redefined by adding or removing sites, no other epitope groups have  
299 been added [3,16,18]; epitopes are still named A–E. In 1999, the epitopes were redefined by more  
300 than doubling the total number of sites and expanding all of the epitope groups [4]. At that  
301 time, the redefinition consisted almost entirely of adding sites; very few sites were eliminated  
302 from the epitope groups. Although this set of sites and their groupings remain by far the most  
303 cited epitope sites, it is not particularly clear what data justified this definition. Moreover, when  
304 the immune epitope database (IEDB) summarized the publicly available data for influenza in  
305 2007, it only included one experimental B cell epitope in humans (Table 2 in [36]). Although  
306 there were a substantial number of putative T cell epitopes in the database, *a priori* there is  
307 no reason to expect a T cell epitope to show preference to hemagglutinin as opposed to any  
308 other influenza protein; yet it is known that several other influenza proteins show almost no  
309 sites under positive selection. Moreover, it is known that the B cell response plays the biggest  
310 role in maintaining immunological memory to influenza, and thus it is the most important arm  
311 of the adaptive immune system for influenza to avoid.

312 The historical H3 epitope sites have played a crucial role in molecular evolution research.  
313 Since 1987, an enormous number of methods have been developed to analyze the molecular  
314 evolution of proteins, and specifically, to identify positive selection. The vast majority of these  
315 methods have either used hemagglutinin for testing, have used the epitopes for validation, or  
316 have at some point been applied to hemagglutinin. Most importantly, in all this work, the  
317 epitope definitions have been considered fixed. Most investigators simply conclude that their  
318 methods work as expected because they recover some portion of the epitope sites. Yet virtually  
319 all of these studies identify many sites that appear to be positively selected but are not part of  
320 the epitopes. Likewise, there is no single study that has ever found all of the epitope sites to  
321 be important. Even if the identified sites from all available studies were aggregated, we would  
322 likely not find every site among the historical epitopes in that aggregated set of sites.

## 323 **Implications of historical epitope groups for current research**

324 Given all of this research activity, it seems that the meaning of an immune epitope has been  
325 muddled. Strictly speaking, an immune epitope is a site to which the immune system reacts.  
326 There is no *a priori* reason why an immune epitope needs to be under positive selection, needs  
327 to be a site that has some number or chemical type of amino acid substitutions, or needs to



328 be predictive of influenza whole-genome or hemagglutinin-specific sequence cluster transitions.  
329 Yet, from the beginning of the effort to define hemagglutinin immune epitopes, such features  
330 have been used to identify epitope sites, resulting in a set of sites that may not accurately reflect  
331 the sites against which the human immune system produces antibodies.

332 Ironically, this methodological confusion has actually been largely beneficial to the field of  
333 hemagglutinin evolution. As our data indicate, if the field had been strict in its pursuit of  
334 immune epitopes sites, it would have been much harder to produce predictive models with those  
335 sites, in particular given that experimental data on non-linear epitopes have been sparse until  
336 very recently. By contrast, the historical epitope sites have been used quite successfully in several  
337 predictive models of the episodic nature of influenza sequence evolution. In fact, in our analysis,  
338 historical epitopes displayed the highest amount of variance explained among all individual  
339 predictors (Fig. 2). We argue here that the success of historical epitope sites likely stems from  
340 the fact that they were produced by disparate analyses each of which accounted for a different  
341 portion of the evolutionary pressures on hemagglutinin. Of course, it is important to realize  
342 that some of this success is likely the result of circular reasoning, since the sites themselves were  
343 identified at least partially from sequence analysis that included the clustered, episodic nature  
344 of influenza hemagglutinin sequence evolution.

345 Despite the success of historical epitope groups, they only predict about 18% of the evolu-  
346 tionary rate-variation of hemagglutinin for the entire phylogenetic tree. Since many of these sites  
347 likely are not true immune epitopes (and therefore not host dependent), one might ask which  
348 features of the historical epitope sites make them good predictors. We suspect that they perform  
349 well primarily because they are a collection of solvent-exposed sites near the sialic acid-binding  
350 region (see Fig. S2). We had shown previously that sites within 8 Å of the sialic acid-binding site  
351 are enriched in sites under positive selection, compared to the rest of the protein [20]. A similar  
352 result was found in the original paper by Bush et al. [4]. However, the related metric of distance  
353 from the sialic acid-binding site has not previously been considered as a predictor of evolution  
354 in hemagglutinin. Furthermore, before 1999, most researchers thought the opposite should be  
355 true; that receptor-binding sites should have depressed evolutionary rates [4]. Even today the  
356 field seems split on the matter [21]. As we have shown here, the inverse of the distance from  
357 sialic acid is a relatively strong quantitative predictor of hemagglutinin evolution; by itself this  
358 distance metric can account for 16% of evolutionary rate-variation. Moreover, by combining this  
359 one metric with another to control for solvent exposure, we can account for more than a third  
360 of the evolutionary rate variation in hemagglutinin. For reference, this number is larger than  
361 the variation one could predict by collecting and analyzing all of the hemagglutinin sequences  
362 that infect birds (another group of animals with large numbers of natural influenza infections),  
363 and using those rates to predict human influenza hemagglutinin evolutionary rates [20].

364 In terms of re-grouping experimental immune data, it is important to note that the IEDB  
365 has major limitations; not all existing (not to mention all possible) immunological data have  
366 been added. Further, the extent to which certain epitopes (e.g., stalk epitopes) have been  
367 mapped may be more reflective of a bias in research interests among influenza researchers than  
368 a bias in the human immune system. Also, until recently, the ability to generate unbiased  
369 high-affinity antibodies to influenza has been limited [37, 38]. Therefore, in our re-derivation of  
370 epitope groupings, we are certainly missing sites or may be incorrectly grouping the ones that we  
371 have. Our analysis of epitope sites will likely have to be redone as more data become available.

372 However, we expect that as more non-linear data become available, they will broadly follow the  
373 trend observed in the linear epitope data, that is, the more antibodies are mapped, the more  
374 sites in the hemagglutinin protein appear in at least one mapping, until virtually every site in the  
375 entire hemagglutinin protein is represented. Under this scenario, the ability to predict evolution  
376 from immunological data would become worse, not better, as more data are accumulated.

377 One additional caveat comes from any potential effect of glycosylation on influenza immune  
378 escape. It is known that glycosylations on hemagglutinin can have a major effect on antibody  
379 binding [13]. In addition, the number of glycosylations in H3 hemagglutinin has increased since  
380 initial introduction of pandemic H3N2 in 1968 [13]. However, *a priori* there is no reason to  
381 believe that glycosylation will either increase or decrease  $dN/dS$  at individual sites or groups  
382 of sites; it could affect  $dN/dS$  in either direction, in particular if direct antibody escape is not  
383 the primary driver of hemagglutinin evolution. Moreover, there is no clear way to incorporate  
384 glycosylation into our regression model. In the future, investigating changing glycosylation pat-  
385 terns throughout the evolution of H3 hemagglutinin may yield important insights into influenza  
386 adaptation and immune escape.

### 387 **Geometric constraints likely dominate adaptive evolution in hemagglutinin**

388 Why do geometric constraints (solvent exposure and proximity to receptor-binding site) do a  
389 good job predicting hemagglutinin evolutionary rates? Hemagglutinin falls into a class of pro-  
390 teins known collectively as viral spike glycoproteins (GP). In general, the function of these  
391 proteins is to bind a host receptor to initiate and carry out uptake or fusion with the host  
392 cell. Therefore, a priori one might expect that the receptor-binding region would be the most  
393 conserved part of the protein, since binding is required for viral entry. Yet, in hemagglutinin  
394 sites near the binding region are the most variable in the entire protein. There are at least two  
395 possible models that might explain this observation. First, conventional wisdom says that in  
396 terms of host immune evasion, antibodies that bind near the receptor-binding region may be  
397 the most inhibitory, and hence mutations in this region the most effective in allowing immune  
398 escape. Viral spike GPs have a surface that is both critical for viral survival and is sufficiently  
399 long lived that a host immune response is easily generated against it. There are likely many  
400 other viral protein surfaces that are comparatively less important or sufficiently short lived dur-  
401 ing a conformational change that antibody neutralization is impractical. Thus, the virions that  
402 survive to the next generation are those with substantial variation at the surface or surfaces  
403 with high fitness consequences and a long half-life in vivo. Evolutionary variation at surfaces  
404 with low or no fitness consequences, or at short-lived surfaces, should behave mostly like neu-  
405 tral variation and hence appear as random noise, not producing a consistent signal of positive  
406 selection. Second, according to the avidity modulation model of Hensley et al. [23], it is possible  
407 that antibody inhibition is not overcome by escaping the antibody directly. Rather, a single or a  
408 few relatively rare mutations may increase the avidity of hemagglutinin for its receptor so as to  
409 out-compete partial antibody inhibition. Subsequently, once the partial inhibition is overcome  
410 in a competent host, passage to an incompetent host allows genetic drift to bring the avidity  
411 back down to baseline. Considering the fact that neither historical nor experimental immune  
412 epitopes vastly out-performed our simple distance metric, we think that our results support the  
413 avidity modulation model [23], which does not predict a bias based on antibody binding sites.

414 However, it remains a possibility that the historical epitopes and current experimental data are  
415 simply wrong about which sites and groups of sites the human immune system attacks. Either  
416 way, our work highlights the need for a paradigm shift in the field.

417 We also need to consider that actual epitope sites, i.e., sites toward which the immune  
418 system has a bias, may not be that important for the evolution of viruses. An epitope is simply  
419 a part of a viral protein to which the immune system reacts. Therefore, it represents a host-  
420 centered biological bias. The virus may experience stronger selection at regions with high fitness  
421 consequences but that generate a relatively moderate host response compared to other sites with  
422 low fitness consequences that generate a relatively strong host response. Moreover, there is little  
423 reason to believe that influenza *must* escape an antibody by directly reducing the binding of  
424 that antibody. There are many other possible scenarios for immune evasion. Thus, we expect  
425 that the geometric constraints we have identified here will be more useful in future modeling  
426 work than the experimental epitope groups we have defined. Moreover, we expect that similar  
427 geometrical constraints will exist in other viral spike glycoproteins, and in particular in other  
428 hemagglutinin variants.

429 By contrast to the clear geometric constraints we observed for the pre-fusion structure,  
430 we found no comparable result for the post-fusion structure. There are perhaps several good  
431 reasons to expect this result. First, the transition state is likely very short-lived, such that the  
432 human immune system is not able to generate antibodies against it. Second, due to the short-  
433 lived functional nature of the transition state, there is likely relatively little selection for folding  
434 stability. Therefore, for the post-fusion structure we do not expect to observe the RSA–rate  
435 correlation that exists in the pre-fusion structure and in most other proteins. Third, models  
436 describing the transition from the pre-fusion to the post-fusion state show that the HA1 chain  
437 dissociates from the HA2 chain [39]. Subsequently, the HA2 chain carries out virtually all of  
438 the fusogenic functions. Thus, the HA1 chain is likely the functional unit in the first step of  
439 entry and the HA2 chain is likely the functional unit in the second. However, there is almost no  
440 rapid evolution happening in the HA2 chain, i.e., the HA2 chain does not seem to experience  
441 any positive diversifying selection.

442 Remarkably, the sites we found that experienced the most positive selection showed mini-  
443 mal overlap with the sites found to be minimally sufficient for explaining the major antigenic  
444 transitions in H3N2, as determined by HI assays with ferret antisera [21]. While both groups  
445 of sites lie near the sialic-acid binding region, the vast majority of positively selected sites are  
446 located basally to sialic acid whereas sites identified by HI assays lie predominantly on the api-  
447 cal side (Fig. 4). This finding suggests that HI assays and positive selection analyses reflect  
448 distinct biological mechanisms. For example, HI assays might not accurately reflect selection  
449 pressures *in vivo*. Such a result would suggest that influenza is not under pressure to directly  
450 escape antibody binding. Alternatively, HI assays may correctly identify mutations that lead to  
451 antigenic cluster transitions whereas positive selection analyses may identify sites that mediate  
452 avidity [23] or antigenic drift within a cluster. Yet another alternative is that the standard man-  
453 ner for obtaining ferret antisera simply may not represent a good proxy for the cyclical nature of  
454 human influenza infections [40]. Indeed, recent evidence suggests that, at least for the pandemic  
455 H1N1 strain, cyclical infections can shift the antibody response toward the receptor-binding  
456 region [41]. In future work, disentangling the different mechanisms reflected by HI assays and  
457 by positive-selection analyses will likely be crucial for improved prediction of HA evolution and

458 of optimal vaccine strains.

## 459 **Materials and Methods**

### 460 **Obtaining influenza data and preparing sequences**

461 All of the data we analyzed were taken from the Influenza Research Database (IRD) [42]. The  
462 IRD provides experimental immune epitope data curated from the data available in the Immune  
463 Epitope Database (IEDB) [43].

464 We used sequences that had been collected since the 1991–1992 influenza season. Any season  
465 before the 1991–1992 season had an insufficient number of sequences to contribute much to the  
466 selection analysis. The sequences were filtered to remove redundant sequences and laboratory  
467 strains. The sequences were then aligned with MAFFT [44]. Since it is known that there have  
468 been no insertions or deletions since the introduction of the H3N2 strain, we imposed a strict  
469 opening penalty and removed any sequences that had intragenic gaps. In addition, we manually  
470 curated the entire set to remove any sequence that obviously did not align to the vast majority  
471 of the set; in total the final step only removed about 10 sequences from the final set of 3854  
472 sequences. For the subsequent evolutionary rate calculations, we built a tree with FastTree  
473 2.0 [45].

### 474 **Computing evolutionary rates and relative solvent accessibilities**

475 To compute evolutionary rates, we used a fixed effects likelihood (FEL) approach with the MG94  
476 substitution model [24,46,47]. We used the FEL provided with the HyPhy package [24]. For the  
477 full setup see the linked GitHub repository ([https://github.com/wilkelab/influenza\\_HA\\_evolution](https://github.com/wilkelab/influenza_HA_evolution)).  
478 As is the case for all FEL models, an independent evolutionary rate is fit to each site using only  
479 the data from that column of the alignment. Because our data set consisted of nearly 4000  
480 sequences, almost every site in our alignment had a statistically significant posterior probability  
481 of being either positively or negatively selected after adjusting via the false discovery rate (FDR)  
482 method. As shown in Figure 3, all evolutionary rates fall into a range between  $dN/dS = 0$  and  
483  $dN/dS = 4$ .

484 We computed RSA values as described previously [28]. Briefly, we used DSSP [48] to compute  
485 the solvent accessibility of each amino acid in the hemagglutinin protein. Then, we used the  
486 maximum solvent accessibilities [49] for each amino acid to normalized the solvent accessibilities  
487 to relative values between 0 and 1. We found that RSA calculated in the trimeric state produced  
488 better predictions than RSA calculated in the monomeric state. Thus, we used multimeric  
489 RSA in all models in this study. Both multimeric and monomeric RSA are included in the  
490 supplementary data.

### 491 **Evolutionary rate-distance correlations**

492 To create the structural heat map of correlations shown in Fig. 1B, we first needed to calculate  
493 the correlations between evolutionary rates and pairwise distances, calculated in turn for each  
494 location in the protein structure as the reference point for the distance calculations. Concep-  
495 tually, we can think of this analysis as overlaying a grid on the entire protein structure, where

496 we first calculate the distance to various grid points from every  $C_\alpha$  in the entire protein, and  
497 then compute the correlation between the set of distances to the sites on the grid and the evolu-  
498 tionary rate at those sites. In practice, we calculated the distance from each  $C_\alpha$  to every other  
499  $C_\alpha$ . We then colored each residue by the correlation obtained between evolutionary rates and  
500 all distances to its  $C_\alpha$ .

## 501 Statistical analysis and data availability

502 All statistical analyses were performed using R [50]. We built the linear models with both the  
503 `lm()` and `glm()` functions. For cross validation, we used the `cv.glm()` function within the boot  
504 package. Residual standard error values were computed by taking the square root of the delta  
505 value from `cv.glm()`. With the exception of graph visualizations, all figures in this manuscript  
506 were created using `ggplot2` [51].

507 A complete data set including evolutionary rates, epitope assignments, RSA, and proximity  
508 to the receptor-binding site is available as Table S1. Raw data and analysis scripts are avail-  
509 able at [https://github.com/wilkelab/influenza\\_HA\\_evolution](https://github.com/wilkelab/influenza_HA_evolution). In the repository, we have  
510 included all human H3 sequences from the 1991–1992 season to present combined into a single  
511 alignment. We have cleaned the combined data to only include sequences with canonical bases,  
512 non-repetitive sequences, and we have hand filtered the data to ensure all included sequences  
513 align appropriately to the 566 known amino acid sites. In addition, we have built a tree and  
514 visually verified that there were no outlying sequences on the tree for the combined set.

## 515 Technical considerations for analysis

516 The site-wise numbering for the H3 hemagglutinin protein reflects the numbering of the mature  
517 protein; this numbering scheme requires the removal of the first 16 amino acids in the full-  
518 length gene. Thus, for protein numbering purposes, site number 1 is actually the 17th codon  
519 in full-length gene numbering. The complete length of the H3 hemagglutinin gene is 566 sites  
520 while the total length of the protein is 550 sites. It is important to point out that the mature  
521 H3 protein has two chains (HA1 and HA2) that are produced by cutting the precursor (HA0)  
522 protein between sites 329 and 330 in protein numbering. In addition, as a result of cloning and  
523 experimental diffraction limitations, most (or likely all) hemagglutinin structures do not include  
524 some portion of the first or last few amino acids of either chain of the mature protein, and  
525 crystallographers always remove the C-terminal transmembrane span from HA2. For example,  
526 the structure we used (PDBID: 4FNK) in this study does not include the first 8 amino acids  
527 of HA1, the last 3 amino acids of HA1, or the last 48 amino acids of HA2. As a result,  
528 HA1 includes sites 9–326 and HA2 includes sites 330–502. The complete data table in the  
529 project repository lists the gene sequence from one of the three original H3N2 (Hong Kong flu)  
530 hemagglutinin (A/Aichi/2/1968), the gene numbering, the protein numbering, the numbering  
531 of one H3N2 crystal structure, historical immune epitope sites from 1981, 1987 and 1999, and  
532 every calculated parameter used (and many others than were not used) in this study. In general,  
533 the most common epitope definitions in use today are those employed by Bush et. al 1999 [4].  
534 Throughout this work, we refer to the Bush et. al 1999 epitopes as the “historical epitope sites”.

## 535 Acknowledgments

536 We would like to thank Jesse Bloom and Trevor Bedford for helpful comments on this manuscript  
537 and Robin Bush for providing us with a complete list of the historical epitope groupings.

## 538 References

- 539 1. Pybus OG, Rambaut A (2009) Evolutionary analysis of the dynamics of viral infectious  
540 disease. *Nature Rev Genet* 10: 540–550.
- 541 2. Bhatt S, Holmes EC, Pybus OG (2011) The genomic rate of molecular adaptation of the  
542 human influenza A virus. *Mol Biol Evol* 28: 2443–2451.
- 543 3. Luksza M, Lassig M (2014) A predictive fitness model for influenza evolution. *Nature*  
544 507: 57–61.
- 545 4. Bush RM, Bender CA, Subbarao K, Cox NJ, Fitch WM (1999) Predicting the evolution  
546 of human influenza A. *Science* 286: 1921–1925.
- 547 5. Koelle K, Cobey S, Grenfell B, Pascual M (2006) Epochal evolution shapes the phylody-  
548 namics of interpandemic influenza A (H3N2) in humans. *Science* 314: 1898–1903.
- 549 6. Plotkin JB, Dushoff J, Levin SA (2002) Hemagglutinin sequence clusters and the antigenic  
550 evolution of influenza A virus. *Proc Natl Acad Sci USA* 99: 6263–6268.
- 551 7. Bedford T, Suchard MA, Lemey P, Dudas G, Gregory V, et al. (2014) Integrating influenza  
552 antigenic dynamics with molecular evolution. *eLife* 3: e01914.
- 553 8. Wolf YI, Viboud C, Holmes EC, Koonin EV, Lipman DJ (2006) Long intervals of stasis  
554 punctuated by burst of positive selection in the seasonal evolution of influenza a virus.  
555 *Biology Direct* 1: 34.
- 556 9. Vijaykrishna D, Smith GJD, Pybus OG, Zhu H, Bhatt S, et al. (2011) Long-term evolution  
557 and transmission dynamics of swine influenza A virus. *Nature* 473: 519–522.
- 558 10. Wiley DC, Wilson IA, Skehel JJ (1981) Structural identification of the antibody-binding  
559 sites of Hong Kong influenza haemagglutinin and their involvement in antigenic variation.  
560 *Nature* 289: 373–378.
- 561 11. Wiley DC, Skehel JJ (1987) The structure and function of the hemagglutinin membrane  
562 glycoprotein of influenza virus. *Ann Rev Biochem* 56: 365–394.
- 563 12. Bush RM, Fitch WM, Bender CA, Cox NJ (1999) Positive selection on the H3 hemagglu-  
564 tinin gene of human influenza virus A. *Mol Biol Evol* 16: 1457–1465.
- 565 13. Skehel JJ, Wiley DC (2000) Receptor binding and membrane fusion in virus entry: the  
566 influenza hemagglutinin. *Ann Rev Biochem* 69: 531–569.

- 567 14. Smith DJ, Lapedes AS, de Jong JC, Bestebroer TM, Rimmelzwaan GF, et al. (2004)  
568 Mapping the antigenic and genetic evolution of influenza virus. *Science* 205: 371–375.
- 569 15. Suzuki Y (2006) Natural selection on the influenza virus genome. *Mol Biol Evol* 23:  
570 1902–1911.
- 571 16. Shih AC, Hsiao T, Ho M, Li W (2007) Simultaneous amino acid substitutions at antigenic  
572 sites drive influenza a hemagglutinin evolution. *Proc Natl Acad Sci USA* 104: 6283–6288.
- 573 17. Tamuri AU, dos Reis M, Hay AJ, Goldstein RA (2009) Identifying changes in selective  
574 constraints: Host shifts in influenza. *PLoS Comput Biol* 5: e1000564.
- 575 18. Pan K, Deem MW (2011) Quantifying selection and diversity in viruses by entropy meth-  
576 ods, with application to the haemagglutinin of H3N2 influenza. *J Roy Soc Interface* 8:  
577 1644–1653.
- 578 19. Meyer AG, Wilke CO (2013) Integrating sequence variation and protein structure to  
579 identify sites under selection. *Mol Biol Evol* 30: 36–44.
- 580 20. Meyer AG, Dawson ET, Wilke CO (2013) Cross-species comparison of site-specific  
581 evolutionary-rate variation in influenza hemagglutinin. *Phil Trans R Soc B* 368: 20120334.
- 582 21. Koel BF, Burke DF, Bestebroer TM, van der Vliet S, Zondag GCM, et al. (2013) Substi-  
583 tutions near the receptor binding site determine major antigenic change during influenza  
584 virus evolution. *Science* 342: 976–979.
- 585 22. Neher RA, Russell CA, Shraiman BI (2014) Predicting evolution from the shape of ge-  
586 nealogical trees. *eLife* 3: e03568.
- 587 23. Hensley SE, Das SR, Bailey AL, Schmidt LM, Hickman HD, et al. (2009) Hemagglutinin  
588 receptor binding avidity drives influenza A virus antigenic drift. *Science* 326: 734–736.
- 589 24. Kosakovsky Pond SL, Frost SDW, Muse SV (2005) HyPhy: hypothesis testing using  
590 phylogenetics. *Bioinformatics* 21: 676–679.
- 591 25. Mirny LA, Shakhnovich EI (1999) Universally conserved positions in protein folds: reading  
592 evolutionary signals about stability, folding kinetics and function. *J Mol Biol* 291: 177–  
593 196.
- 594 26. Bustamante CD, Townsend JP, Hartl DL (2000) Solvent accessibility and purifying se-  
595 lection within proteins of *Escherichia coli* and *Salmonella enterica*. *Mol Biol Evol* 17:  
596 301–308.
- 597 27. Franzosa EA, Xia Y (2009) Structural determinants of protein evolution are context-  
598 sensitive at the residue level. *Mol Biol Evol* 26: 2387–2395.
- 599 28. Shahmoradi A, Sydykova DK, Spielman SJ, Jackson EL, Dawson ET, et al. (2014) Pre-  
600 dicting evolutionary site variability from structure in viral proteins: buriedness, packing,  
601 flexibility, and design. *J Mol Evol* 79: 130–142.

- 602 29. Yeh SW, Liu JW, Yu SH, Shih CH, Hwang JK, et al. (2014) Site-specific structural  
603 constraints on protein sequence evolutionary divergence: Local packing density versus  
604 solvent exposure. *Mol Biol Evol* 31: 135–139.
- 605 30. Huang TT, Marcos ML, Hwang JK, Echave J (2014) A mechanistic stress model of protein  
606 evolution accounts for site-specific evolutionary rates and their relationship with packing  
607 density and flexibility. *BMC Evol Biol* 14: 78.
- 608 31. Sikosek T, Chan HS (2014) Biophysics of protein evolution and evolutionary protein bio-  
609 physics. *J Royal Soc Interface* 11: 20140419.
- 610 32. Echave J, Jackson EL, Wilke CO (2014) Relationship between protein thermody-  
611 namic constraints and variation of evolutionary rates among sites. *bioRxivorg* :  
612 <http://dx.doi.org/10.1101/009423>.
- 613 33. Lichtarge O, Bourne HR, Cohen FE (1996) An evolutionary trace method defines binding  
614 surfaces common to protein families. *J Mol Biol* 257: 342-358.
- 615 34. Kim PM, Lu LJ, Xia Y, Gerstein MB (2006) Relating three-dimensional structures to  
616 protein networks provides evolutionary insights. *Science* 314: 1938–1941.
- 617 35. Bullough PA, Hughson FM, Skehel JJ, Wiley DC (1994) Structure of influenza haemag-  
618 glutinin at the pH of membrane fusion. *Nature* 371: 37–43.
- 619 36. Bui H, Peters B, Assarsson E, Mbawuiké I, Sette A (2007) Ab and T cell epitopes of  
620 influenza A virus, knowledge and opportunities. *Proc Natl Acad Sci USA* 104: 246–251.
- 621 37. Wrammert J, Smith K, Miller J, Langley WA, Kokko K, et al. (2008) Influenza-virus  
622 membrane fusion by cooperative fold-back of stochastically induced hemagglutinin inter-  
623 mediates. *Nature* 453: 667–671.
- 624 38. Throsby M, van den Brink E, Jongeneelen M, Poon LLM, Alard P, et al. (2008) Het-  
625 erosubtypic neutralizing monoclonal antibodies cross-protective against h5n1 and h1n1  
626 recovered from human igm+ memory b cells. *PLOS ONE* 3: e3942.
- 627 39. Ivanovic T, Choi JL, Whelan SP, van Oijen AM, Harrison SC (2013) Influenza-virus  
628 membrane fusion by cooperative fold-back of stochastically induced hemagglutinin inter-  
629 mediates. *eLife* 2: e00333.
- 630 40. Linderman SL, Chambers BS, Zost SJ, Parkhouse K, Li Y, et al. (2014) Potential antigenic  
631 explanation for atypical h1n1 infections among middle-aged adults during the 20132014  
632 influenza season. *Proc Natl Acad Sci USA* 111: 15798–15803.
- 633 41. Li Y, Myers JL, Bostick DL, Sullivan CB, Madara J, et al. (2013) Immune history shapes  
634 specificity of pandemic h1n1 influenza antibody responses. *J Exp Med* 210: 1493–1500.
- 635 42. Squires RB, Noronha J, Hunt V, García-Sastre A, Macken C, et al. (2012). Influenza re-  
636 search database: an integrated bioinformatics resource for influenza research and surveil-  
637 lance. *Influenza and Other Respiratory Viruses*, DOI:10.1111/j.1750-2659.2011.00331.x.



- 638 43. Vita R, Zarebski L, Greenbaum JA, Emami H, Hoof I, et al. (2010) The immune epitope  
639 database 2.0. *Nucleic Acids Res* 38: D854–62.
- 640 44. Katoh K, Standley DM (2013) MAFFT multiple sequence alignment software version 7:  
641 improvements in performance and usability. *Mol Biol Evol* 30: 772–780.
- 642 45. Price MN, Dehal PS, Arkin AP (2009) FastTree 2 – approximately maximum-likelihood  
643 trees for large alignments. *PLOS ONE* 5: e9490.
- 644 46. Yang Z (2006) *Computational Molecular Evolution*. Oxford University Press.
- 645 47. Muse SV, Gaut BS (1994) A likelihood approach for comparing synonymous and nonsyn-  
646 onymous nucleotide substitution rates, with application to the chloroplast genome. *Mol*  
647 *Biol Evol* 11: 715–724.
- 648 48. Kabsch W, Sander C (1983) Dictionary of protein secondary structure: pattern recognition  
649 of hydrogen-bonded and geometrical features. *Biopolymers* 22: 2577–2637.
- 650 49. Tien MZ, Meyer AG, Sydykova DK, Spielman SJ, Wilke CO (2013) Maximum allowed  
651 solvent accessibilities of residues in proteins. *PLOS ONE* 8: e80635.
- 652 50. Ihaka R, Gentleman R (1996) R: A language for data analysis and graphics. *Journal of*  
653 *Computational and Graphical Statistics* 5: 299–314.
- 654 51. Wickham H (2009) *ggplot2: elegant graphics for data analysis*. Springer New York. URL  
655 <http://had.co.nz/ggplot2/book>.

656 **Supporting Information Legends**

657 **Data Table S1: Complete data set including evolutionary rates, solvent accessibili-**  
658 **ties, proximities to the receptor-binding region, and epitope status for all sites.**

659 **Text S1: Analysis of available experimental human epitope data.**

660 **Tables**

**Table 1. Predictive performance of each linear model considered.**  $R^2$  is the proportion of variation in  $dN/dS$  explained by the specified model. RSE is the residual standard error of the linear model.  $cvRSE_{10}$  is the cross validated residual standard error calculated by 10-fold cross validation.  $cvRSE_{100}$  is the cross validated residual standard error calculated by leave-one-out cross validation.

| Predictors in the linear model             | $R^2$ | RSE  | $cvRSE_{10}$ | $cvRSE_{100}$ |
|--------------------------------------------|-------|------|--------------|---------------|
| RSA                                        | 0.14  | 0.41 | 0.41         | 0.41          |
| Experimental epitopes                      | 0.15  | 0.41 | 0.42         | 0.42          |
| 1 / Distance                               | 0.16  | 0.40 | 0.41         | 0.41          |
| Bush 1999                                  | 0.18  | 0.40 | 0.41         | 0.41          |
| RSA + Experimental epitopes                | 0.23  | 0.39 | 0.41         | 0.40          |
| RSA + Bush 1999                            | 0.24  | 0.39 | 0.39         | 0.39          |
| 1 / Distance + Experimental epitopes       | 0.23  | 0.39 | 0.40         | 0.40          |
| 1 / Distance + Bush 1999                   | 0.28  | 0.38 | 0.39         | 0.39          |
| RSA + 1 / Distance                         | 0.32  | 0.37 | 0.37         | 0.37          |
| RSA + 1 / Distance + Experimental epitopes | 0.34  | 0.36 | 0.39         | 0.38          |
| RSA + 1 / Distance + Bush 1999             | 0.37  | 0.35 | 0.37         | 0.37          |

661 **Figures**

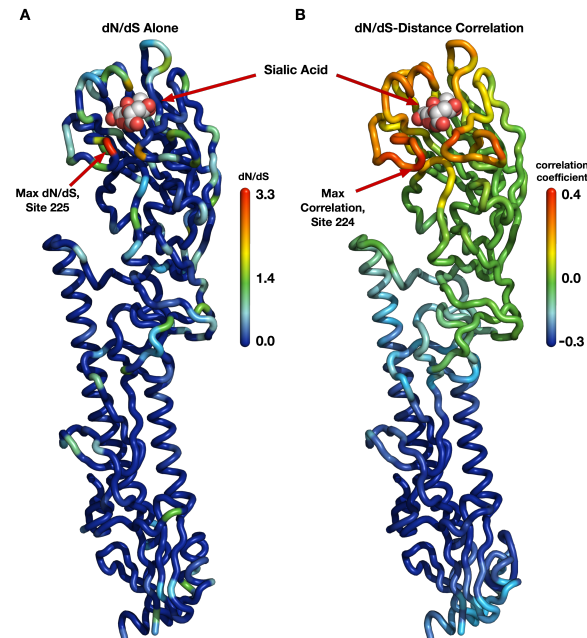

**Figure 1. Evolutionary-rate variation along the hemagglutinin structure.** (A) Each site in the protein structure is colored according to its evolutionary rate  $dN/dS$ . Hot colors represent high  $dN/dS$  (positive selection) while cool colors represent low  $dN/dS$  (purifying selection). (B) Each site in the protein structure is colored according to the  $dN/dS$ -distance correlation obtained when distances are calculated relative to that site. Hot colors represent positive correlations while cool colors represent negative correlations. Thus, distances from sites that are redder are better positive predictors of the evolutionary rates in the protein than are distances from bluer sites; distances from blue sites are actually anti-correlated with evolutionary rate. Distances from sites that are colored green have essentially no predictive ability.

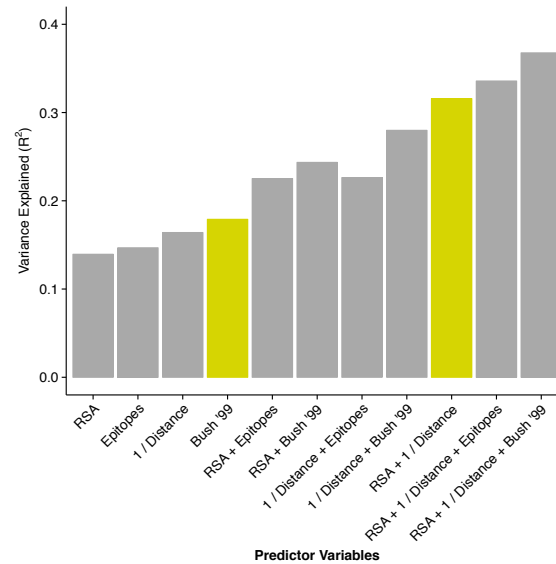

**Figure 2. Proportion of variance in  $dN/dS$  explained by different linear models.**

The height of each bar represents the coefficient of determination ( $R^2$ ) for a linear model consisting of the stated predictor variables. The historical epitope sites from Bush 1999 [4] (yellow bar on the left) are the single best predictor of evolutionary rate variation. However, a model using two predictors that each have a clear biophysical meaning (solvent exposure, proximity to receptor-binding region) explains almost twice the variation in  $dN/dS$  (yellow bar on the right).

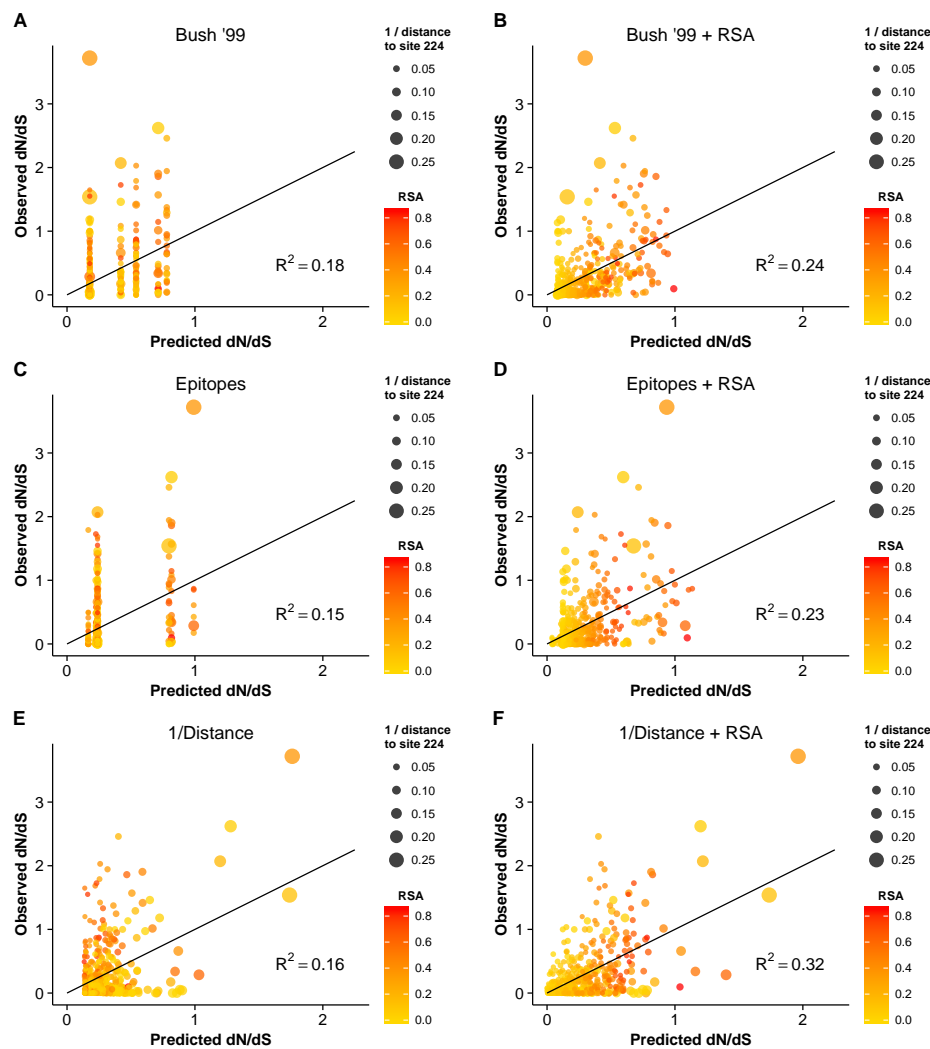

**Figure 3. Observed  $dN/dS$  vs. predicted  $dN/dS$  for different predictive linear models.** (A) Only epitope status according to the historical definition is used as predictor variable. (B) Historical epitope sites and RSA are used as predictor variables. (C) Only epitope status according to the experimental non-linear epitope data is used as predictor variable. (D) Experimental epitope sites and RSA are used as predictor variables. (E) Only proximity to the sialic acid-binding region (measured as 1/Distance to Residue 224) is used as predictor variable. (F) Proximity and RSA are used as predictor variables. Individual sites with  $dN/dS > 1$  are predicted correctly only if the linear model includes the 1/Distance predictor. However, in all cases, adding the RSA predictor significantly improves the model predictions.

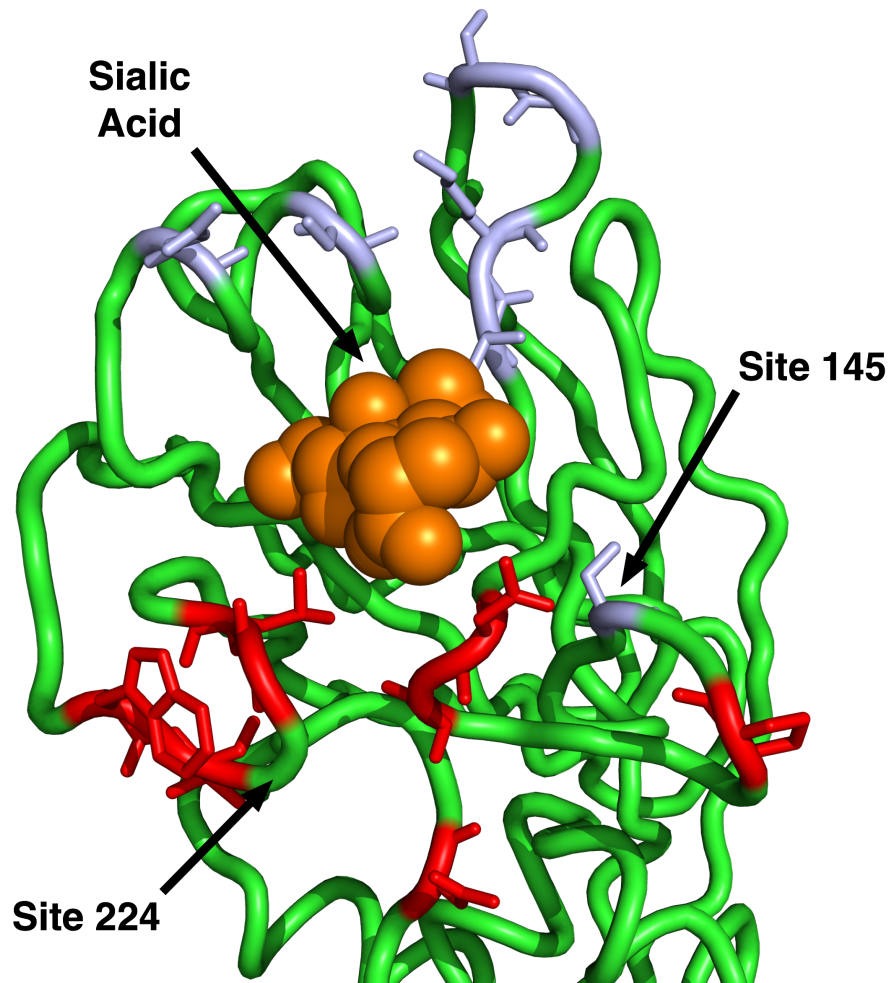

**Figure 4.** Sites identified by Koel et al. 2013 and those predicted to have  $dN/dS > 1$ . The sites shown in purple are those identified by Koel et al. 2013 [21] to be critical for antigenic cluster transitions. Only one of these sites has a  $dN/dS$  significantly above one, site 145. The sites shown in red are those that our geometrical model predicts to have  $dN/dS > 1$ . (Half of those sites have observed  $dN/dS > 1$ .) Note that our model predicts only sites on the basal side of sialic acid to be under positive selection, since our reference point for proximity is site 224. Site 145, the only purple site under positive selection, is also the only purple site on the basal side of sialic acid.

662 **Supplementary Figures**

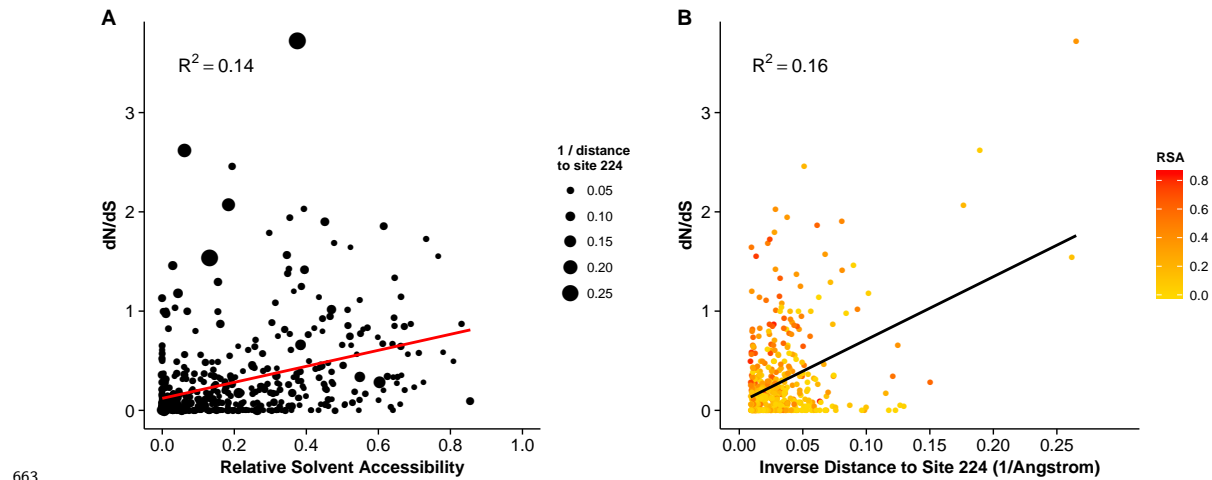

664 **Figure S1: Dependence of  $dN/dS$  on solvent exposure and proximity to the receptor-**  
665 **binding region. (A)  $dN/dS$  vs. RSA. The size of the dots represents  $1/\text{Distance}$ . (B)  $dN/dS$**   
666 **vs.  $1/\text{Distance}$ . The coloring of the dots represents RSA. The distance to the sialic acid-binding**  
667 **region is the single strongest quantitative predictor of evolutionary rate ratio in hemagglutinin.**



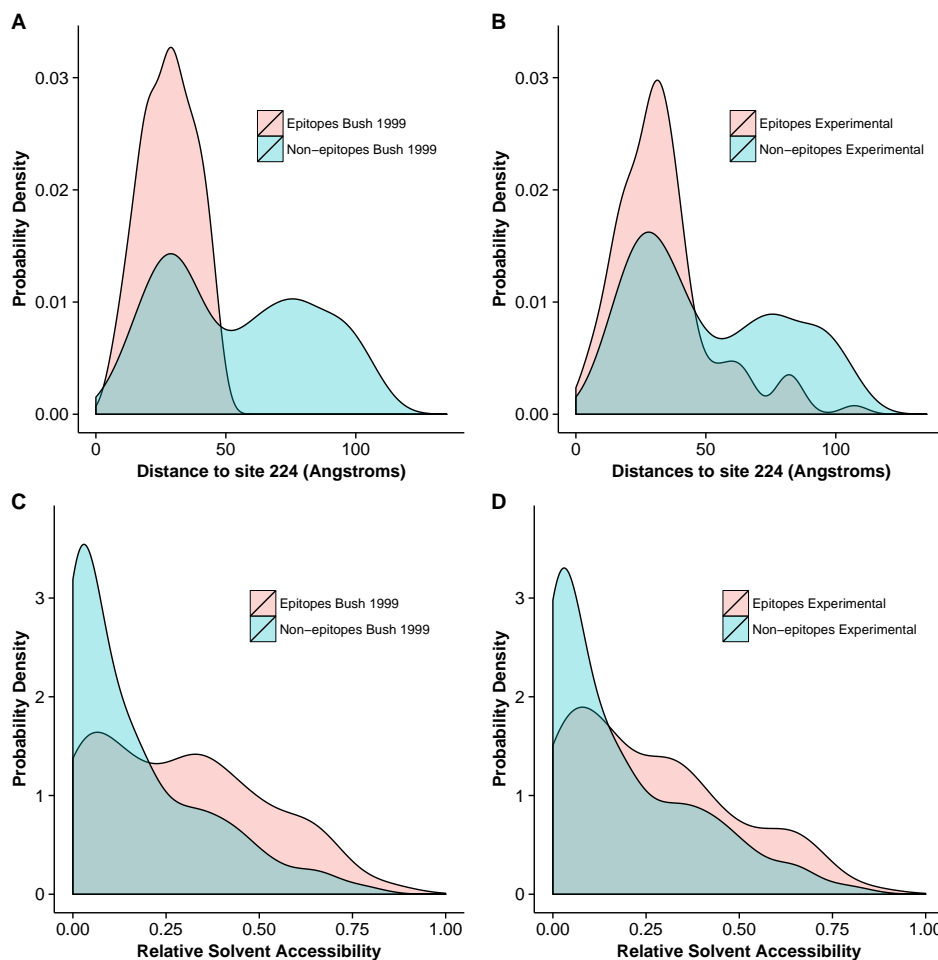

668

669 **Figure S2: Distance to receptor-binding site and solvent exposure for epitope and**  
670 **non-epitope sites.** (A) Distribution of distances to residue 224, for historical epitope and non-  
671 epitope sites. (B) Distribution of distances to residue 224, for experimental non-linear epitope  
672 and non-epitope sites. (C) Distribution of relative solvent accessibilities, for historical epitope  
673 and non-epitope sites. (D) Distribution of relative solvent accessibilities, for experimental non-  
674 linear epitope and non-epitope sites. Under both historical and experimental epitope definitions,  
675 epitope sites are closer to the sialic acid-binding region and have higher RSA than non-epitope  
676 sites.
